# Supplementary material for: The early pregnancy placenta foreshadows DNA methylation alterations of solid tumors
Source: PubMed Central journal article supplement — Epigenetics. 2017 Nov 24;12(9):793–803. doi: 10.1080/15592294.2017.1342912 (PMC5739102; doi:10.1080/15592294.2017.1342912), 2017-11-24
Supplement: kepi-12-09-1342912-s001.pdf [file kepi-12-09-1342912-s001.pdf]

|                                              | Cases                        | Controls                    |
|----------------------------------------------|------------------------------|-----------------------------|
| <b>Placental tissues</b>                     | <b>First trimester</b>       | <b>Third trimester</b>      |
| Chorionic villus (CHVL)                      | 5                            | 10                          |
| <b>Placental cells</b>                       | <b>Early first trimester</b> | <b>Late first trimester</b> |
| Villous cytotrophoblasts (VCTB)              | 9                            | 10                          |
| -----                                        |                              |                             |
| <b>Cancer tissues</b>                        | <b>Tumor</b>                 | <b>Normal</b>               |
| Bladder urothelial carcinoma (BLCA)          | 359                          | 21                          |
| Breast invasive carcinoma (BRCA)             | 501                          | 80                          |
| Colon adenocarcinoma (COAD)                  | 251                          | 36                          |
| Esophageal carcinoma (ESCA)                  | 87                           | 13                          |
| Head & neck squamous cell carcinoma (HNSC)   | 506                          | 50                          |
| Liver hepatocellular carcinoma (LIHC)        | 352                          | 50                          |
| Lung adenocarcinoma (LUAD)                   | 278                          | 26                          |
| Lung squamous cell carcinoma (LUSC)          | 341                          | 41                          |
| Pancreatic adenocarcinoma (PAAD)             | 142                          | 7                           |
| Prostate adenocarcinoma (PRAD)               | 453                          | 50                          |
| Rectum adenocarcinoma (READ)                 | 90                           | 6                           |
| Thyroid carcinoma (THCA)                     | 357                          | 46                          |
| Uterine corpus endometrioid carcinoma (UCEC) | 398                          | 34                          |

### Supplementary Table 1

#### Placenta and cancer samples included in this study.\*

\*First trimester chorionic villi samples were obtained between 6 and 10 weeks of gestation (WG), and third trimester chorionic villi samples were obtained between 32 and 39 WG. Early first trimester villous cytotrophoblast samples were isolated from chorionic villi obtained before entrance of maternal blood into the intervillous space (8-10 WG), and late first trimester villous cytotrophoblast samples were isolated from chorionic villi samples obtained after entrance of maternal blood into the intervillous space (12-14 WG).

|               | CHVL | VCTB | BLCA | BRCA | COAD | ESCA | HNSC | LIHC | LUAD | LUSC | PAAD | PRAD | READ | THCA | UCEC |
|---------------|------|------|------|------|------|------|------|------|------|------|------|------|------|------|------|
| Island-hyper  | 5.8  | 1.2  | 19   | 26   | 27   | 23   | 23   | 20   | 24   | 20   | 15   | 22   | 13   | 4    | 19   |
| Shore-hyper   | 11   | 3.2  | 13   | 24   | 20   | 16   | 19   | 11   | 18   | 18   | 12   | 23   | 8.2  | 4.7  | 19   |
| Shelf-hyper   | 9.1  | 5.5  | 6.8  | 15   | 7.7  | 8.6  | 11   | 4.5  | 10   | 10   | 8    | 15   | 5    | 3.5  | 14   |
| OpenSea-hyper | 10   | 5.8  | 7.9  | 17   | 7.5  | 8.4  | 11   | 4.3  | 12   | 12   | 8.2  | 20   | 4.8  | 4.7  | 16   |
| Island-hypo   | 5.2  | 1.8  | 10   | 5.2  | 4.5  | 3.4  | 6.5  | 10   | 5.6  | 8.8  | 3.1  | 3.3  | 3.4  | 1.4  | 8.7  |
| Shore-hypo    | 17   | 8.7  | 34   | 18   | 18   | 13   | 24   | 33   | 20   | 29   | 11   | 12   | 12   | 7    | 28   |
| Shelf-hypo    | 25   | 13   | 50   | 29   | 32   | 21   | 40   | 52   | 31   | 46   | 14   | 18   | 18   | 10   | 35   |
| OpenSea-hypo  | 26   | 14   | 53   | 35   | 37   | 24   | 42   | 58   | 36   | 48   | 16   | 20   | 21   | 12   | 39   |

## Supplementary Table 2

### Percent of probes displaying significant hypo- and hyper- methylation in each region in placenta and cancers.\*

\*Four first rows: percent of hypomethylation in individual island, shore, and open sea CpG probes (q value < 0.05 and difference < -0.05). Four last rows: percent of hypermethylation in individual island, shore, and open sea CpG probes (q value < 0.05 and difference > 0.05). Abbreviations as in Supplementary Table 1.

|      | Baseline low methylation (N) | Significant hypermethylation (N) | Significant hypermethylation (%) |
|------|------------------------------|----------------------------------|----------------------------------|
| CHVL | 65263                        | 3937                             | 6.0                              |
| VCTB | 69921                        | 401                              | 0.6                              |
| BLCA | 71551                        | 18001                            | 25.0                             |
| BRCA | 72139                        | 26106                            | 36.0                             |
| COAD | 68939                        | 26928                            | 39.0                             |
| UCEC | 73234                        | 19277                            | 26.0                             |
| ESCA | 69283                        | 22939                            | 33.0                             |
| HNSC | 71543                        | 23322                            | 33.0                             |
| LIHC | 70122                        | 19705                            | 28.0                             |
| LUAD | 71222                        | 23669                            | 33.0                             |
| LUSC | 73825                        | 20299                            | 27.0                             |
| PAAD | 72600                        | 16665                            | 23.0                             |
| PRAD | 71257                        | 21913                            | 31.0                             |
| READ | 68670                        | 13487                            | 20.0                             |
| THCA | 73995                        | 3766                             | 5.1                              |

### Supplementary Table 3

#### CpG island hypermethylation events in chorionic villi, villous cytotrophoblasts and 13 cancer types\*

\*Baseline low methylation is defined as methylation < 0.20 at island probes in third trimester CHVL, late first trimester VCTB or other normal tissues. Significant hypermethylation corresponds to methylation differences > 0.05 and FDR q-value < 0.05 at island probes in first vs. third trimester CHVL, early vs. late first trimester VCTB, and tumors vs. corresponding normal tissues. Abbreviations as in Supplementary Table 1.

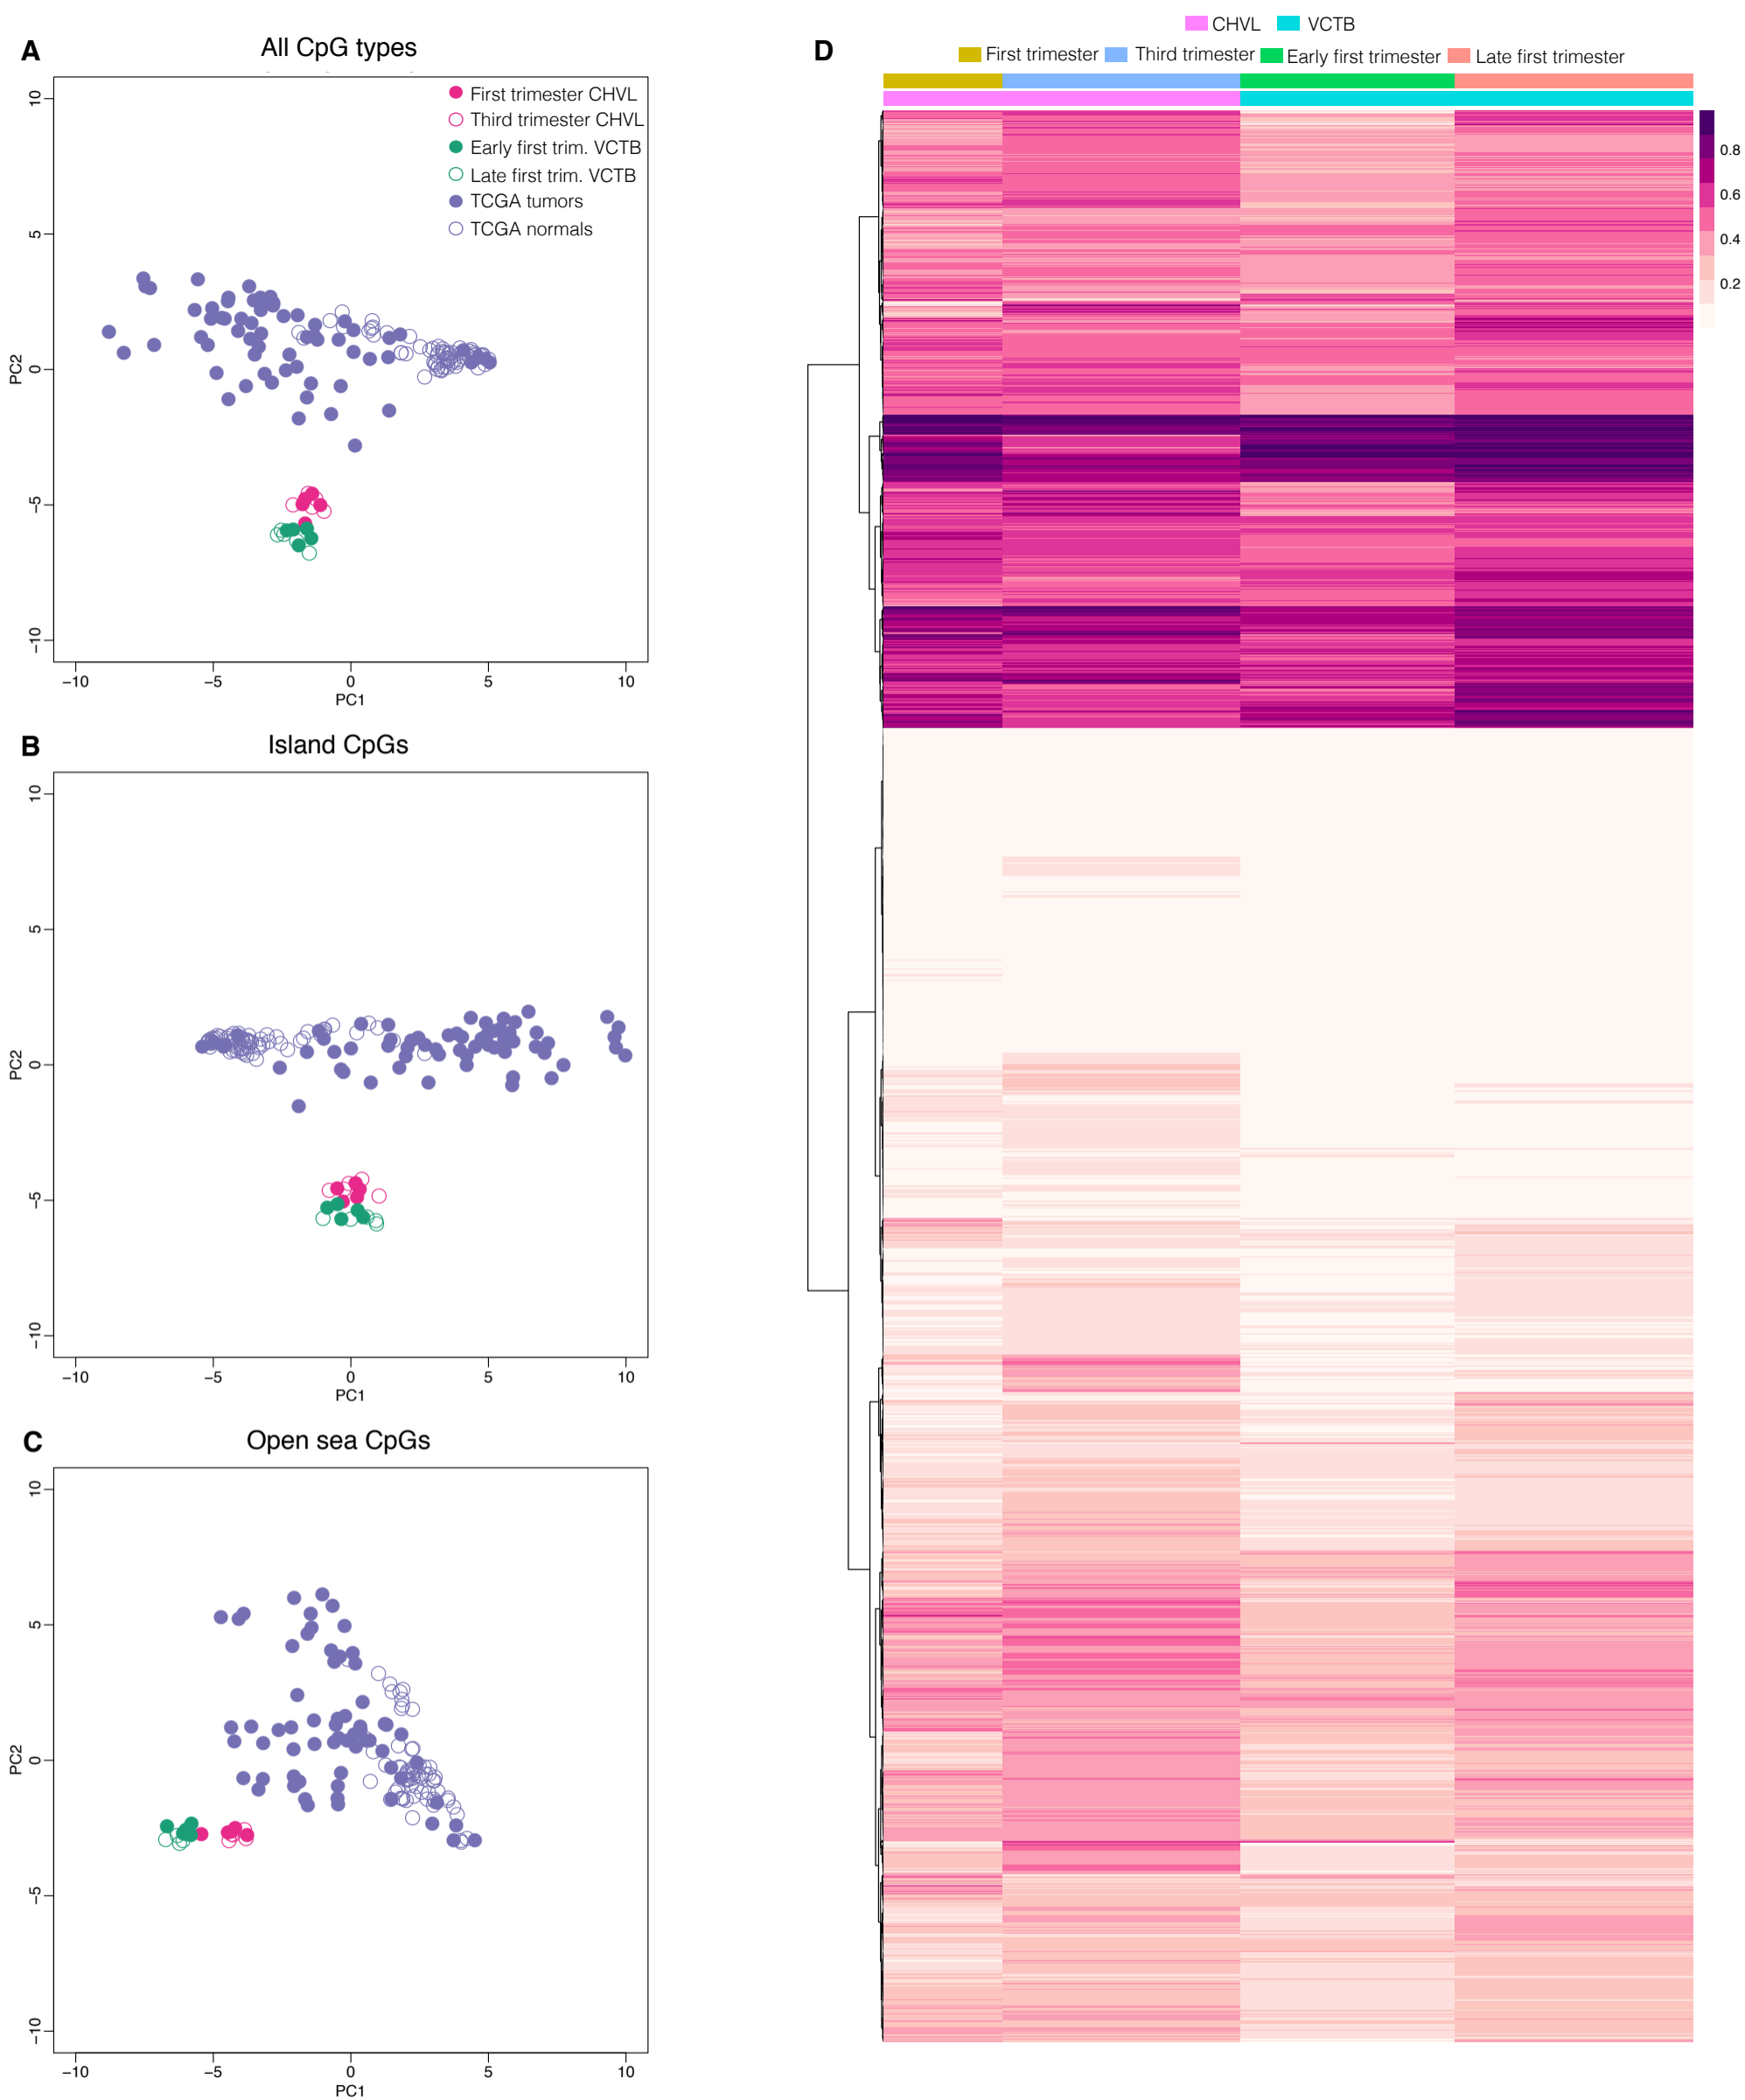

### Supplementary Figure 1

**PCA and heatmap visualization of placenta and cancers .** (A) Principal component analysis (PCA) of the methylation at island, shore, shelf and open sea probes; (B) at island probes; (C) and at open sea probes. For each condition, the 500 most variable probes were selected and plot for five samples. (D) Heatmap representing levels of methylation correspond to the 10 000 most differentially methylated probes in tumors vs. corresponding normal tissues for the 13 cancer types included in the study. Rows were ordered using the ward.2 method for hierarchical clustering built in the R software environment. Abbreviations as in Supplementary Table 1.



Supplementary Figure 2 (1/3)

Individual probe methylation in each region for chorionic villi and 13 cancer types. For each region, 10,000 probes were randomly sampled. Abbreviations as in Supplementary Table 1.

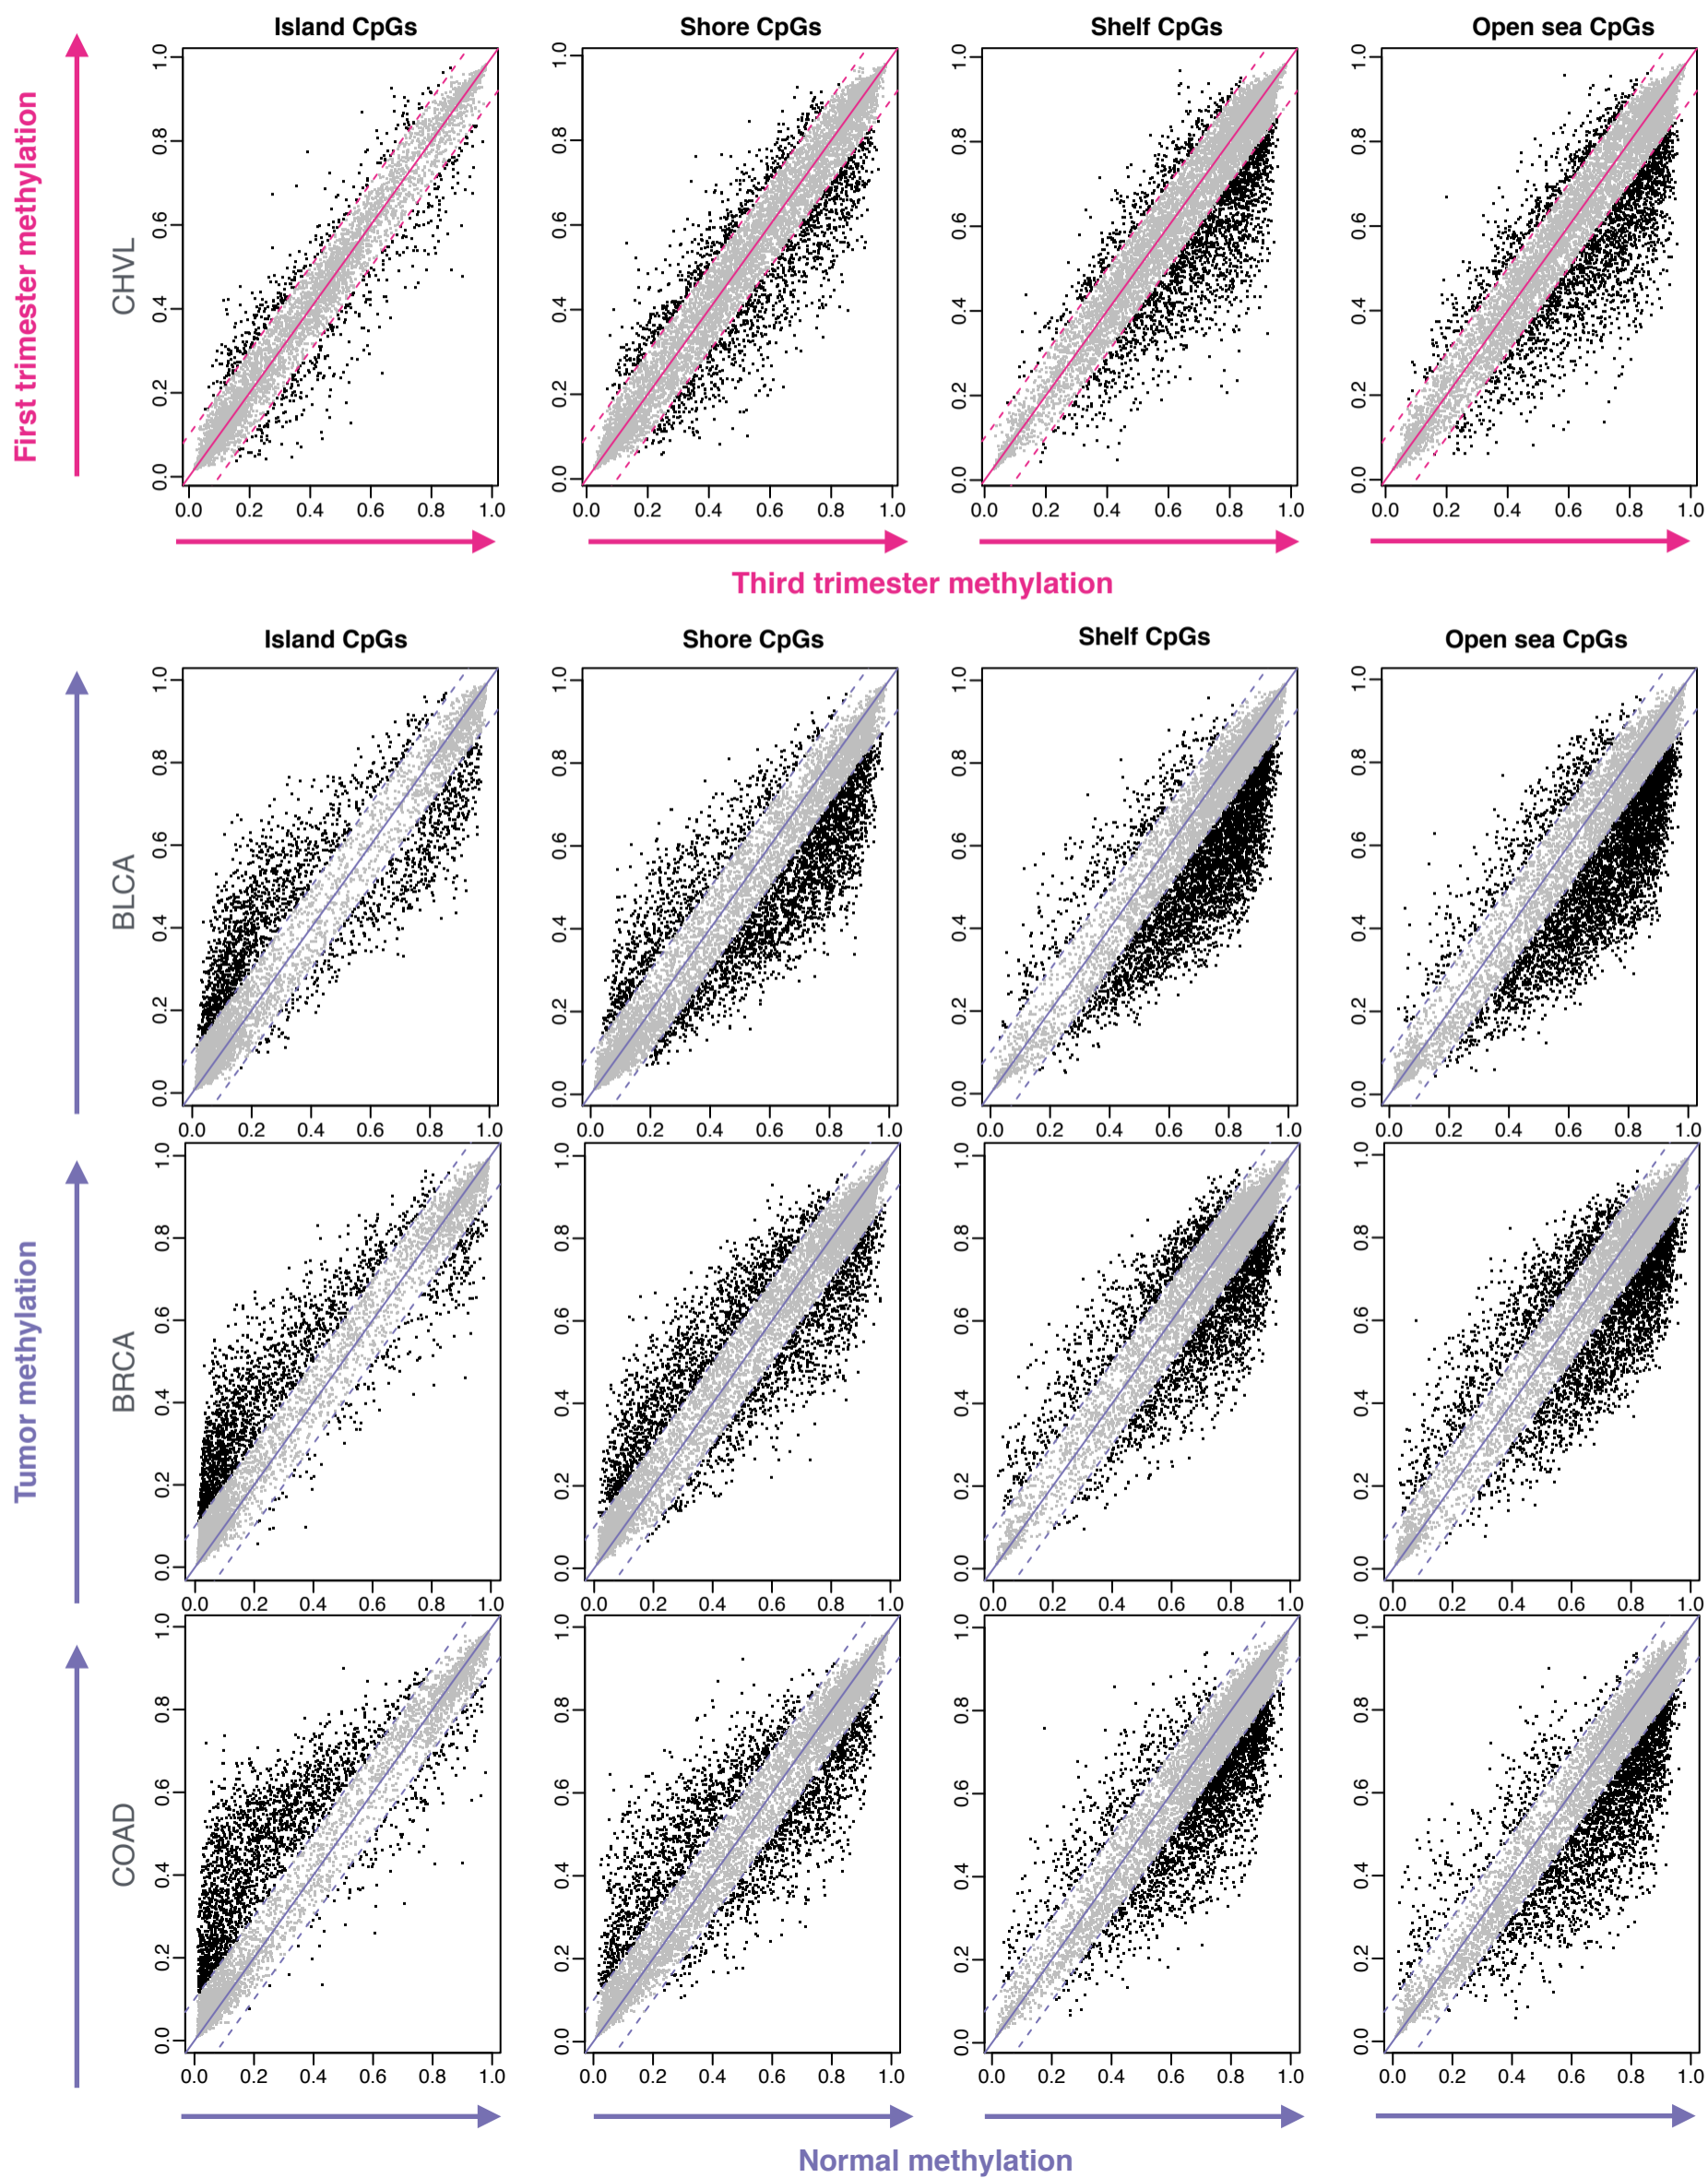

Fig. S2  
(2/3)

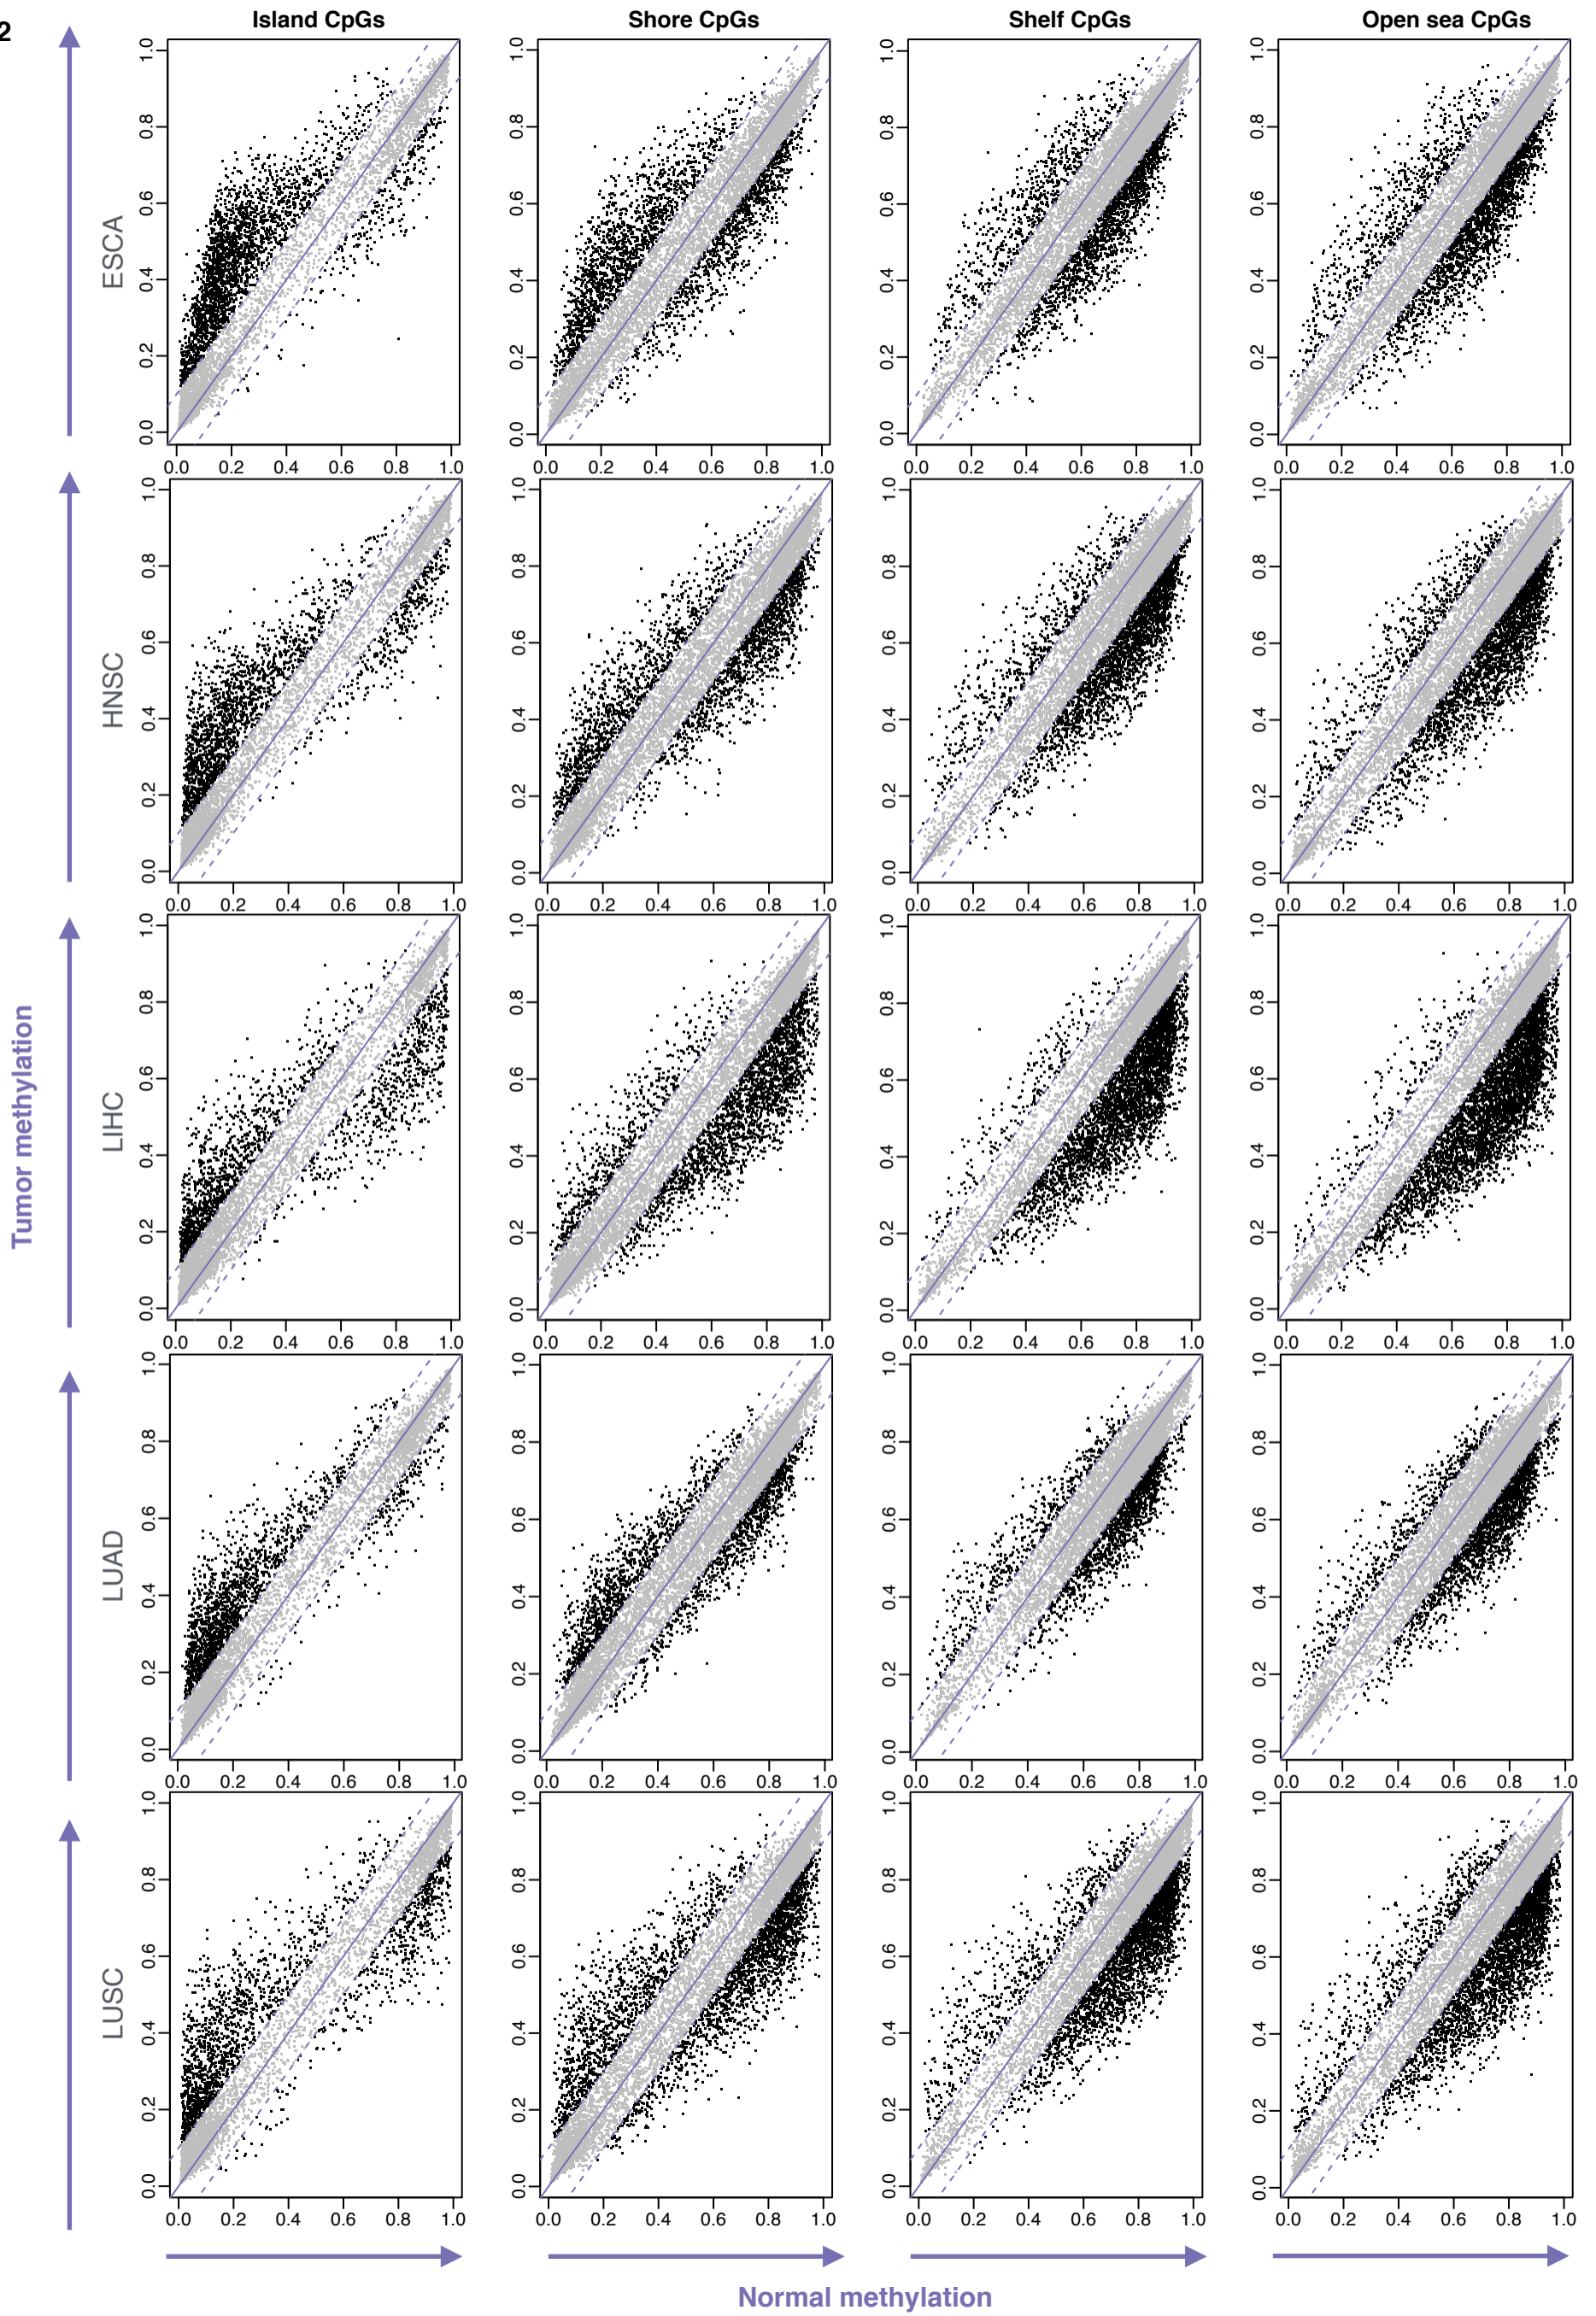

Fig. S2  
(3/3)

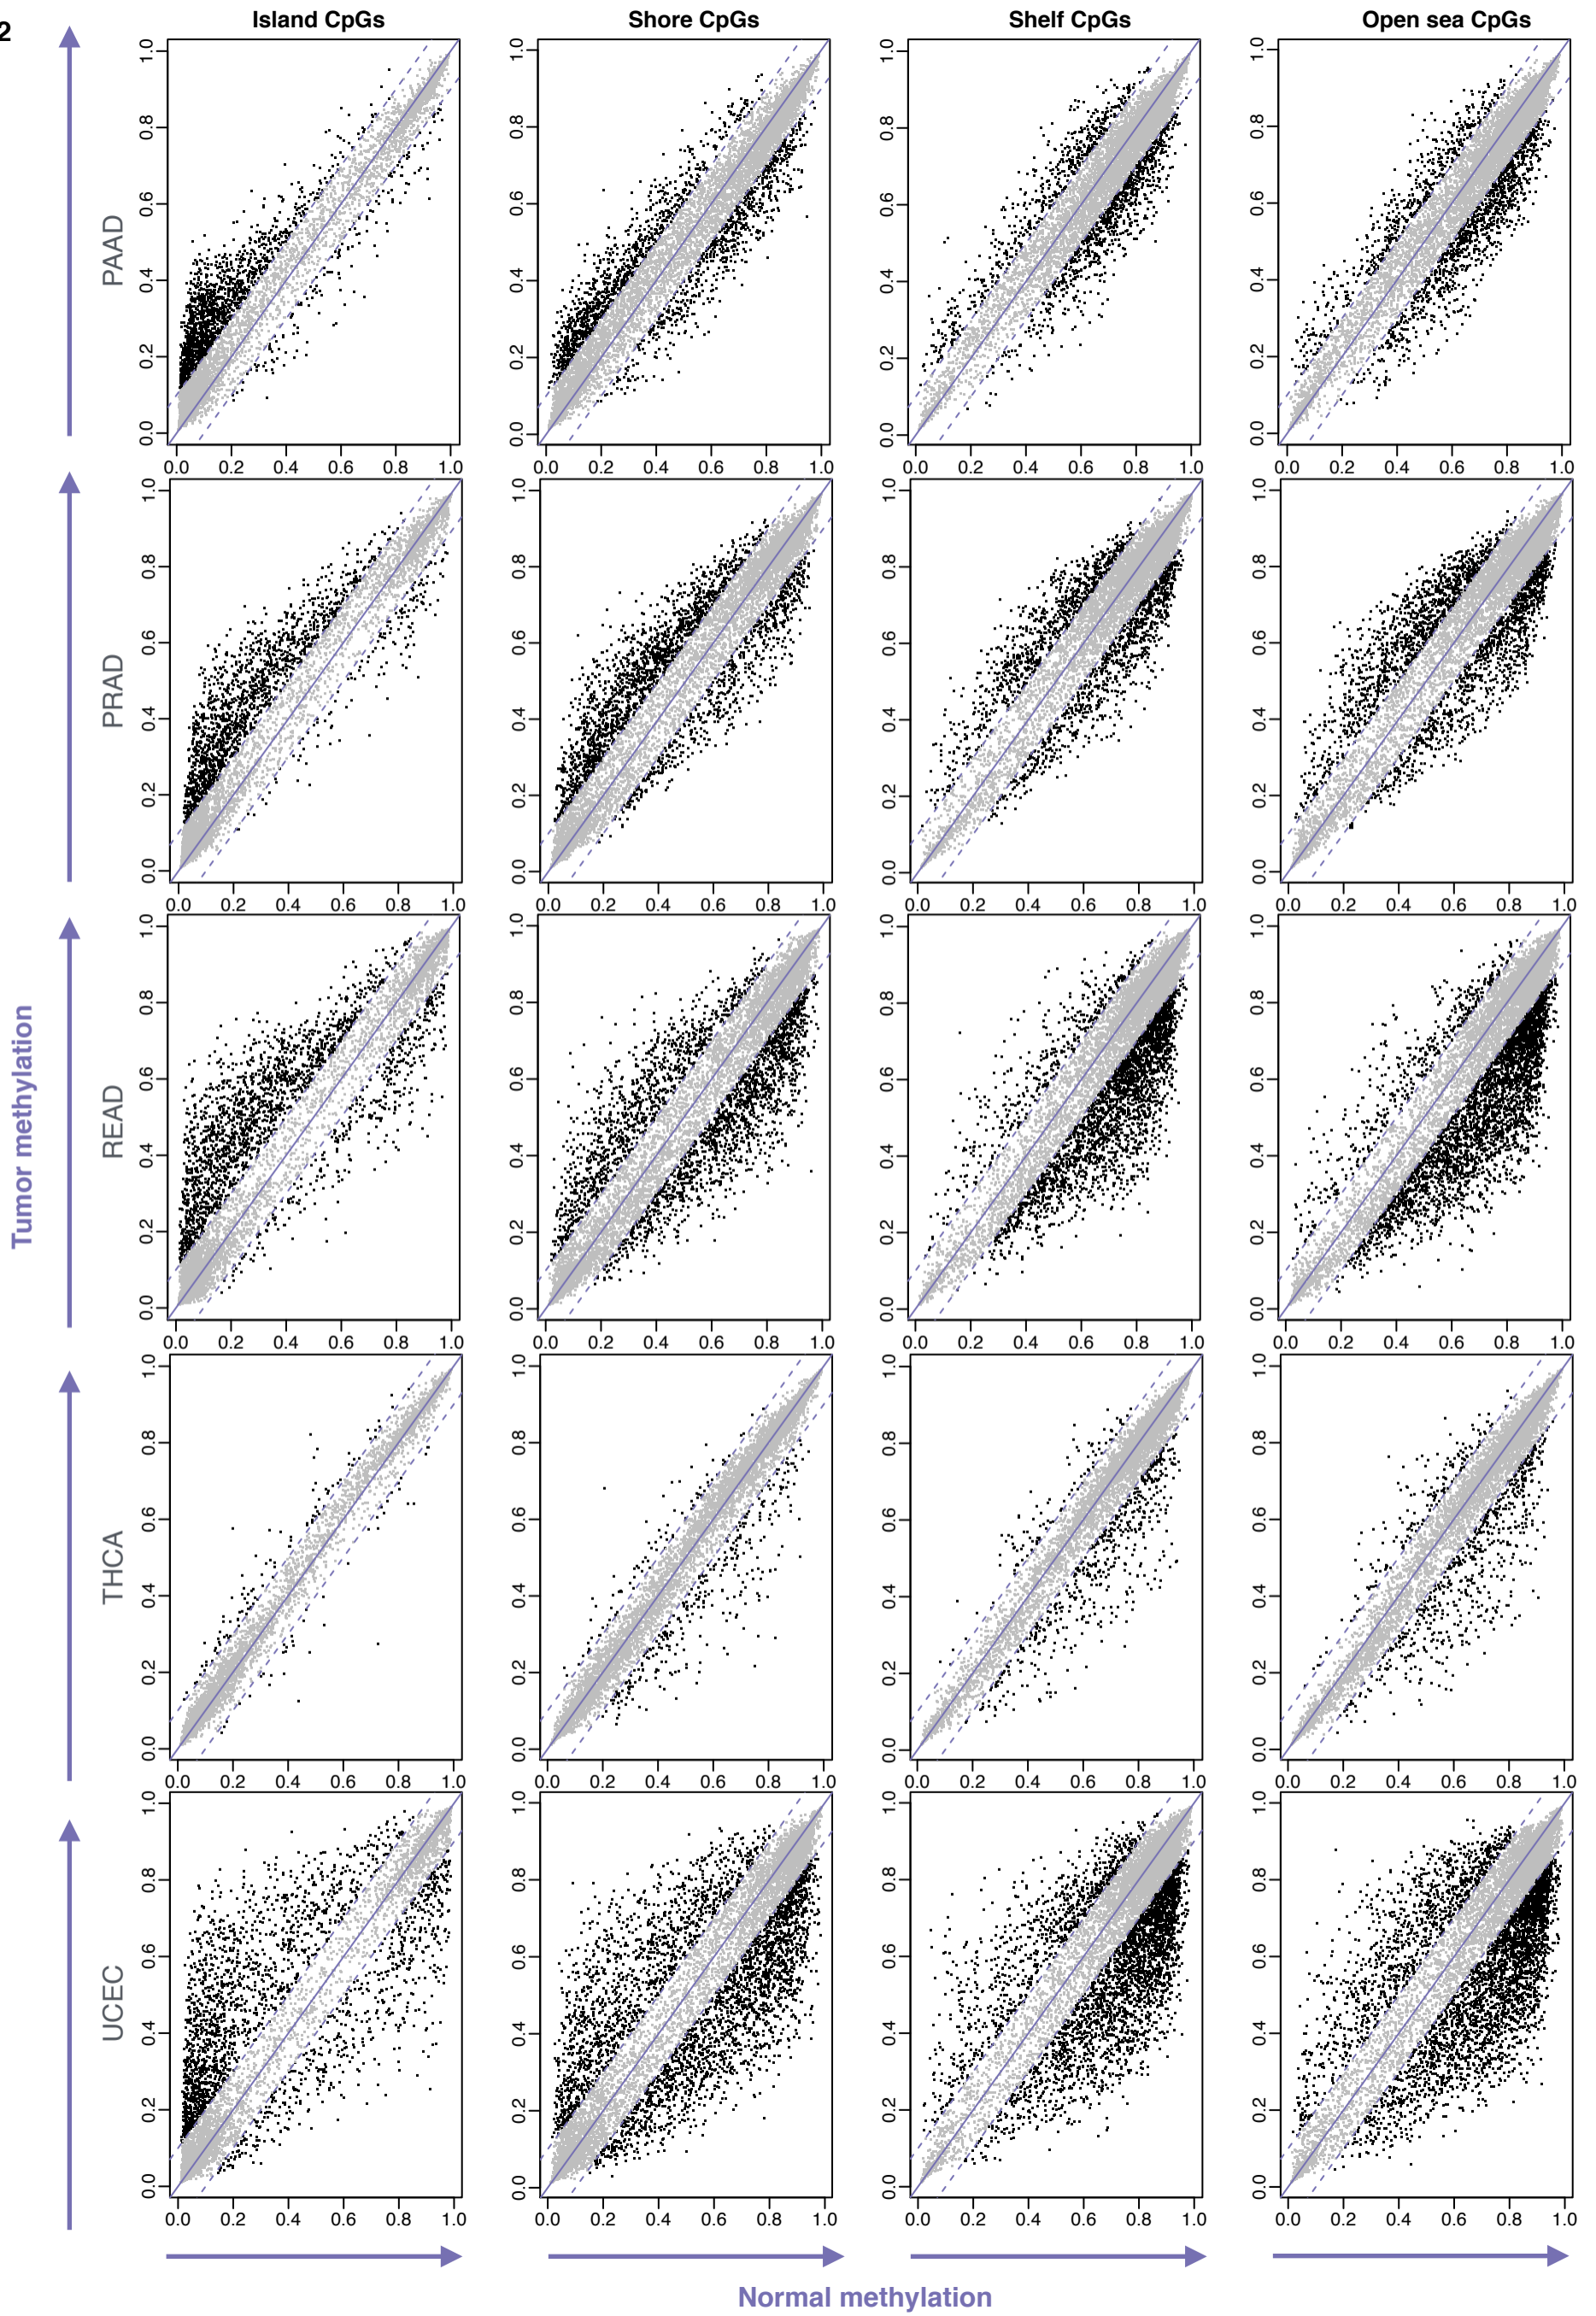

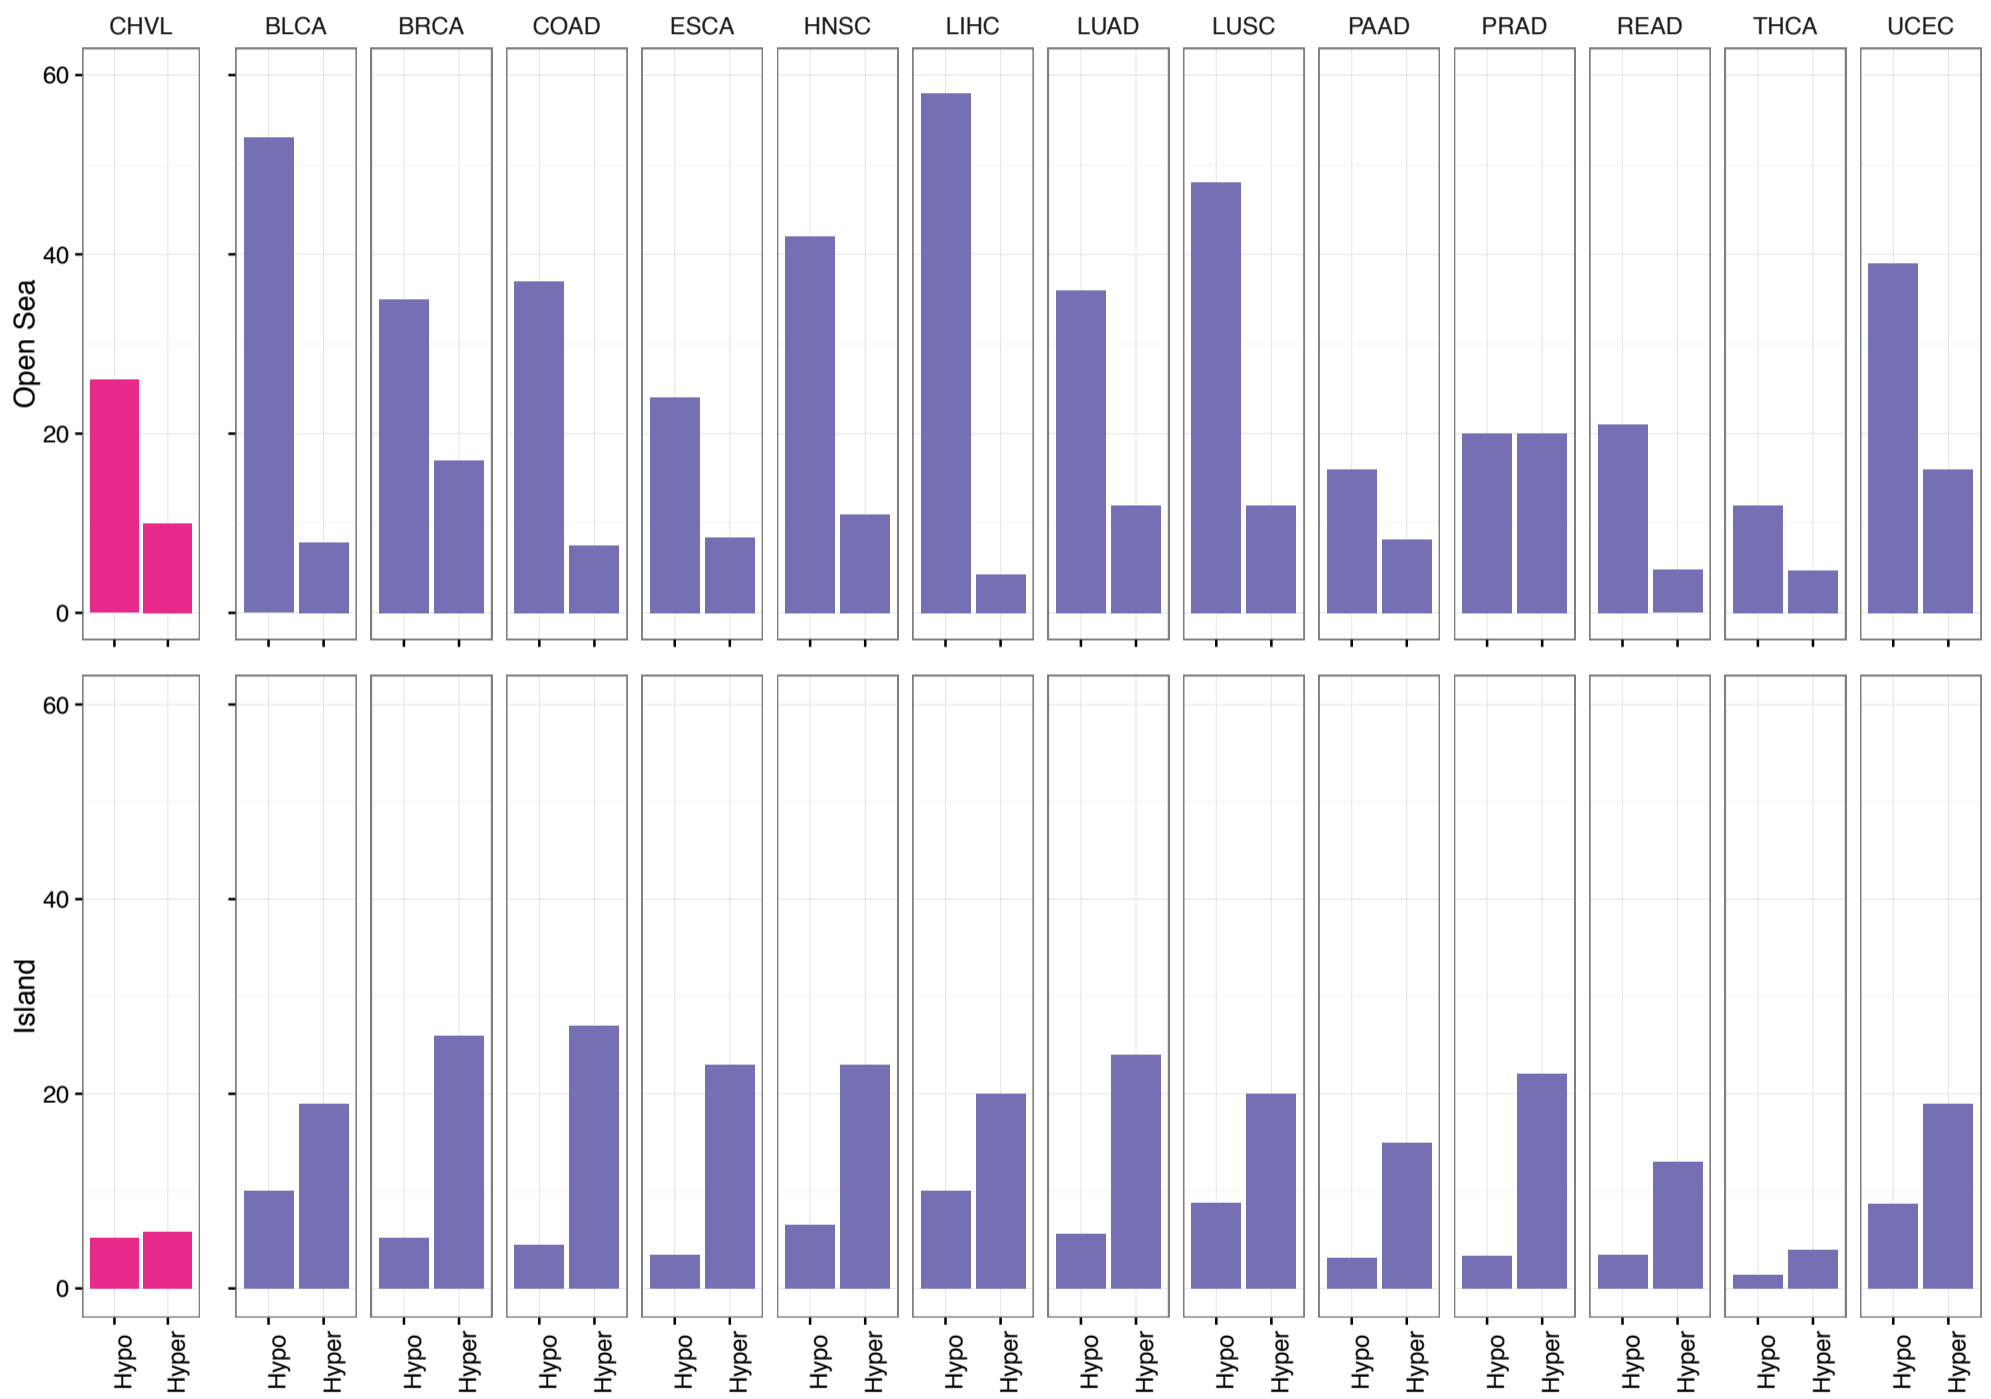

### Supplementary Figure 3

**Main DNA methylation changes in open sea and island CpGs.** Percent of CpG probes displaying a significant ( $q$  value  $< 0.05$ ) hypomethylation (difference  $< -0.05$ ) and hypermethylation (difference  $> 0.05$ ) in open sea regions (top), and island regions (bottom). Pink denotes placenta samples, and purple denotes cancer samples (13 types). Abbreviations as in Supplementary Table 1.

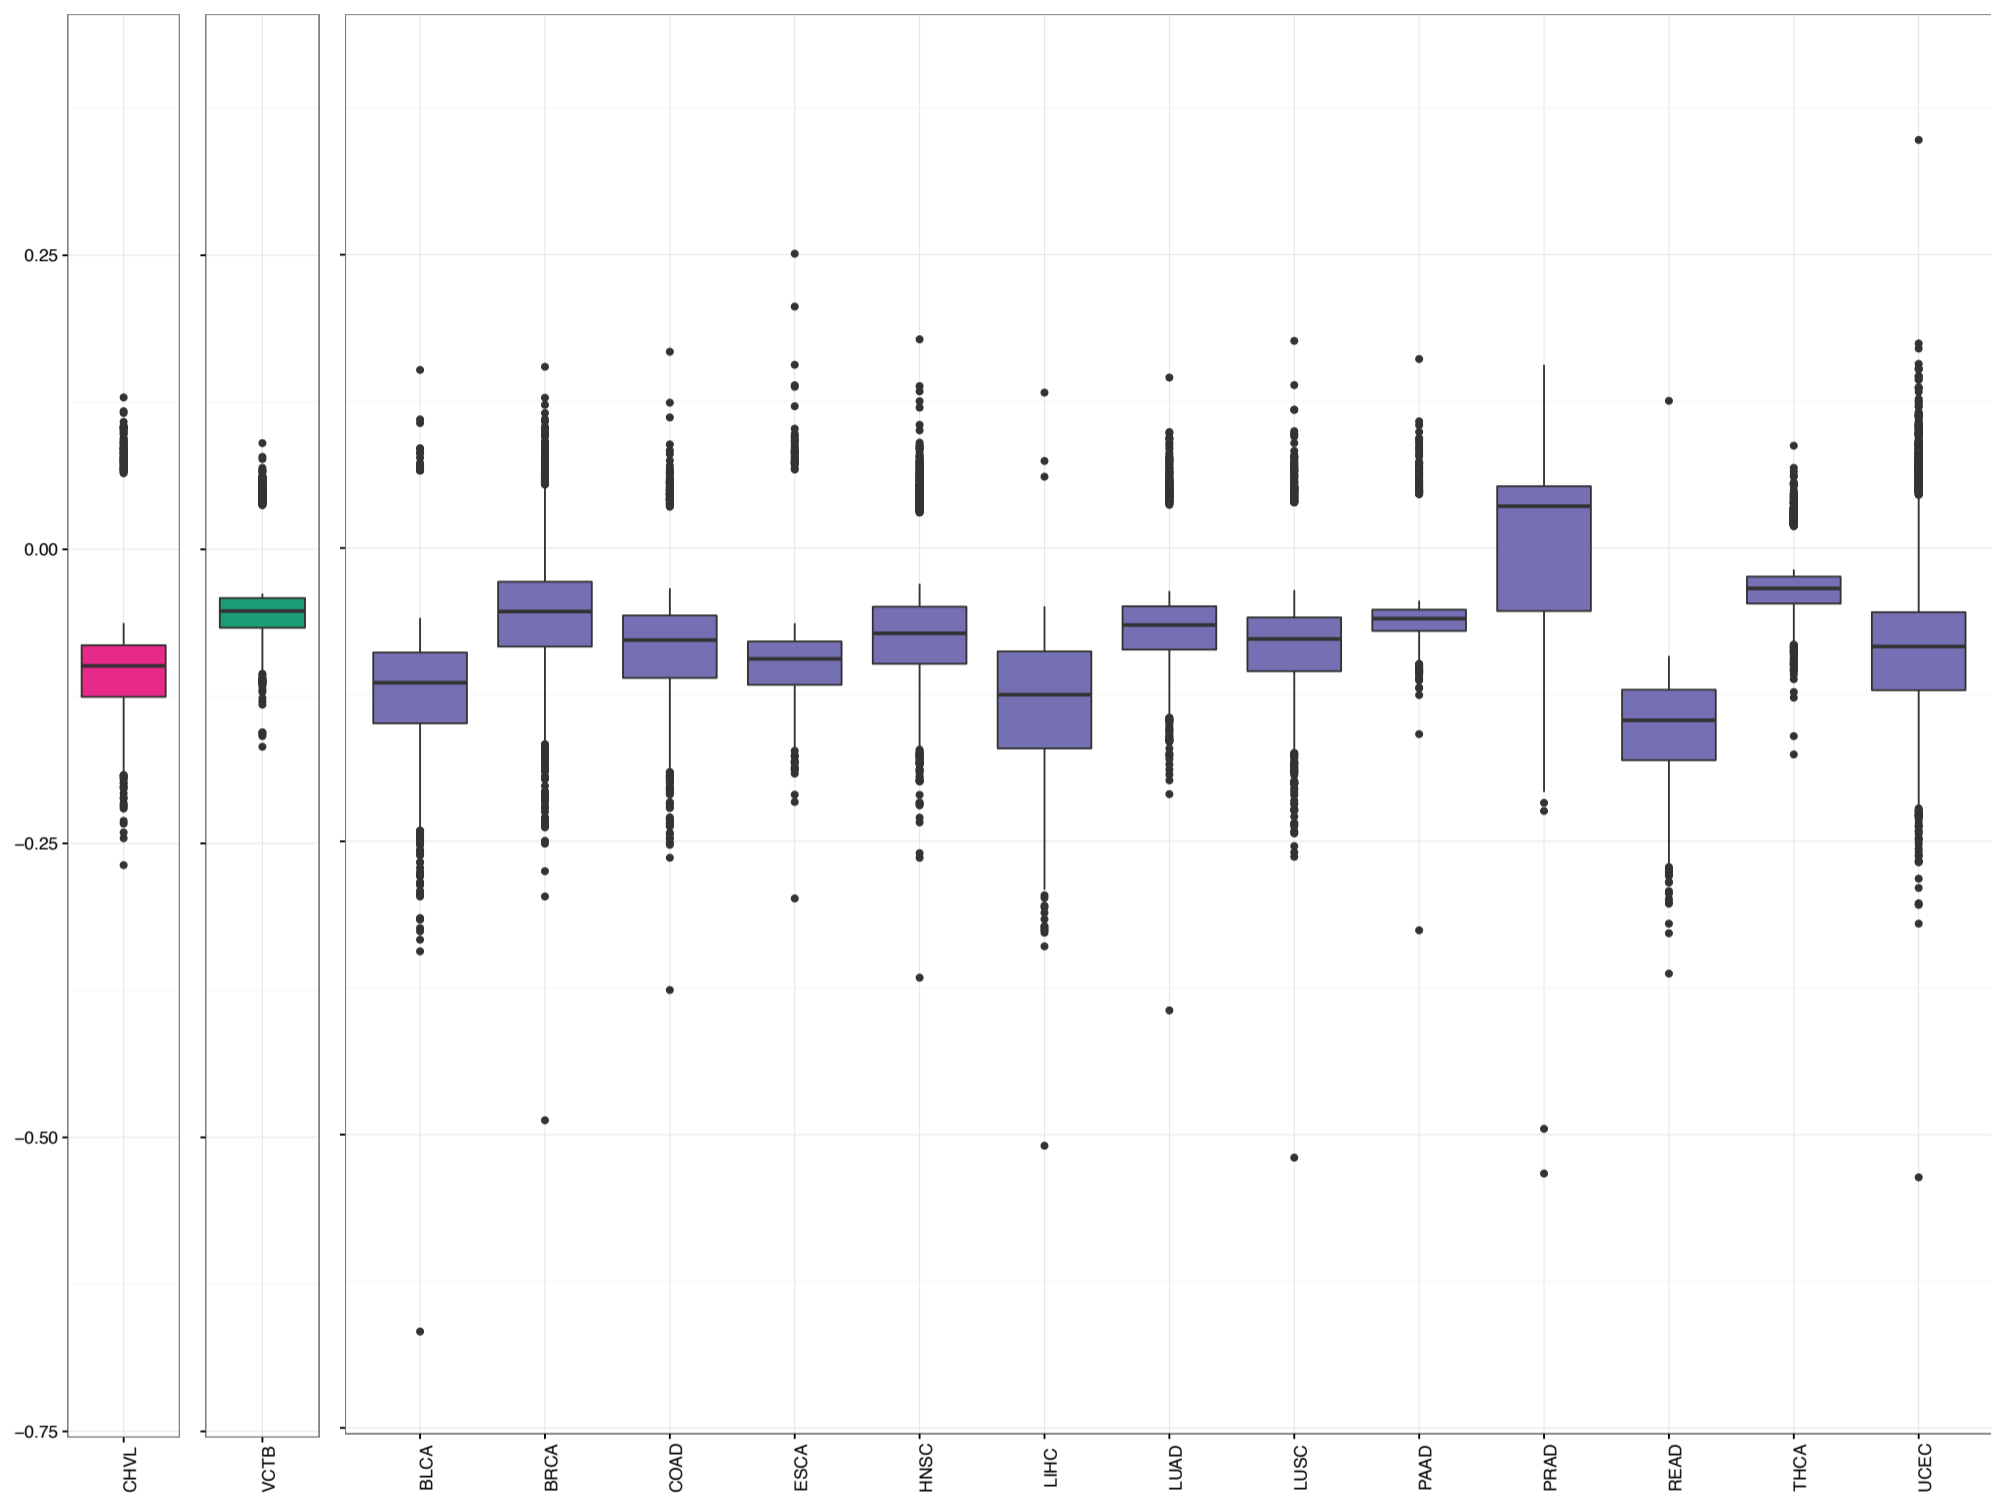

**Supplementary Figure 4**

**Distributions of the median of methylation difference in placenta, cytotrophoblast and cancer hypomethylated blocks.** Distributions of the median of the average difference of methylation in cytotrophoblast hypomethylated blocks in green, in placenta hypomethylated blocks in pink and cancer hypomethylated blocks in purple.

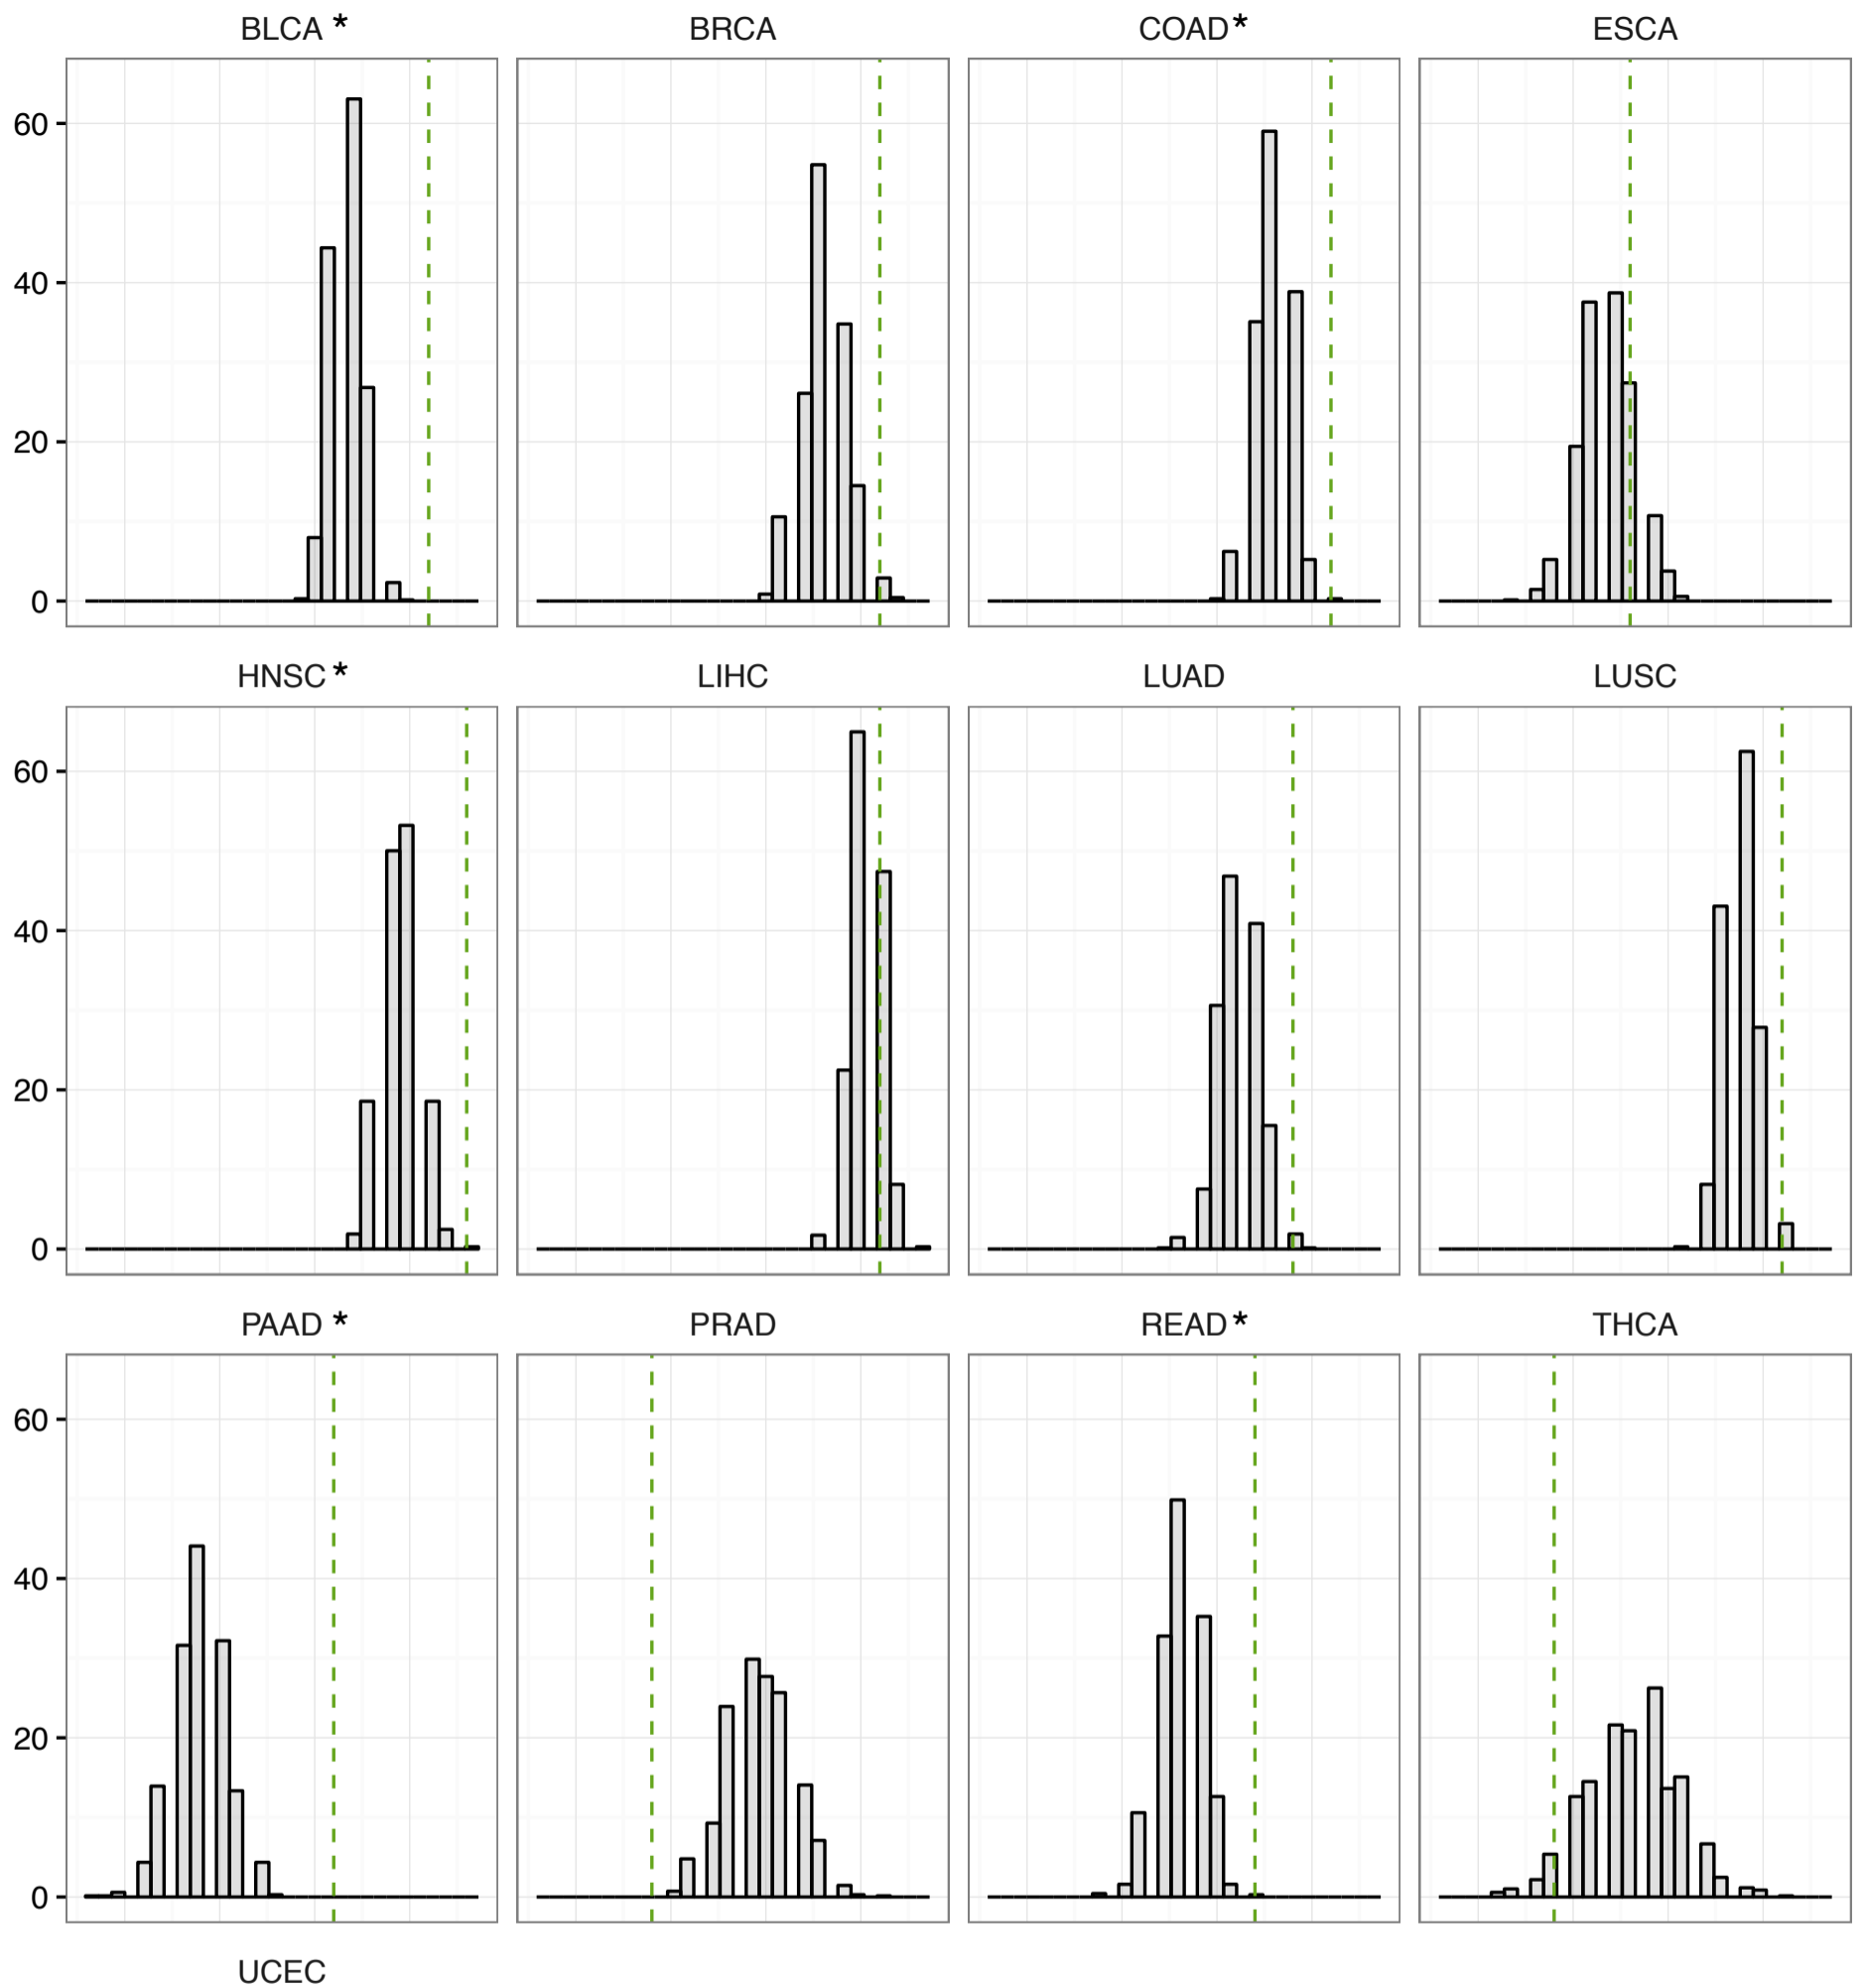

**Supplementary Figure 5**

**Overlaps of the placenta hypomethylated block set and each hypomethylated block set found in cancers** Overlaps of the placenta hypomethylated block set and each hypomethylated block set found in cancers. Histograms represent null distributions of overlaps between simulated placenta hypomethylated blocks and each hypomethylated block set found in cancers (BLCA, BRCA, COAD, ESCA, HNSC, LIHC, LUAD, LUSC, PAAD, PRAD, READ, THCA and UCEC, respectively). The stars “ \* ” denote significant overlaps between the placenta hypomethylated block set and a given hypomethylated block set found in cancers. Bonferroni-adjusted alpha = 0.05. Abbreviations as in Supplementary Table 1.

## Supplementary Figure 6

**Individual probe methylation in each region for villous cytotrophoblasts.** For each region, 10,000 probes were randomly sampled. Abbreviations as in Supplementary Table 1.

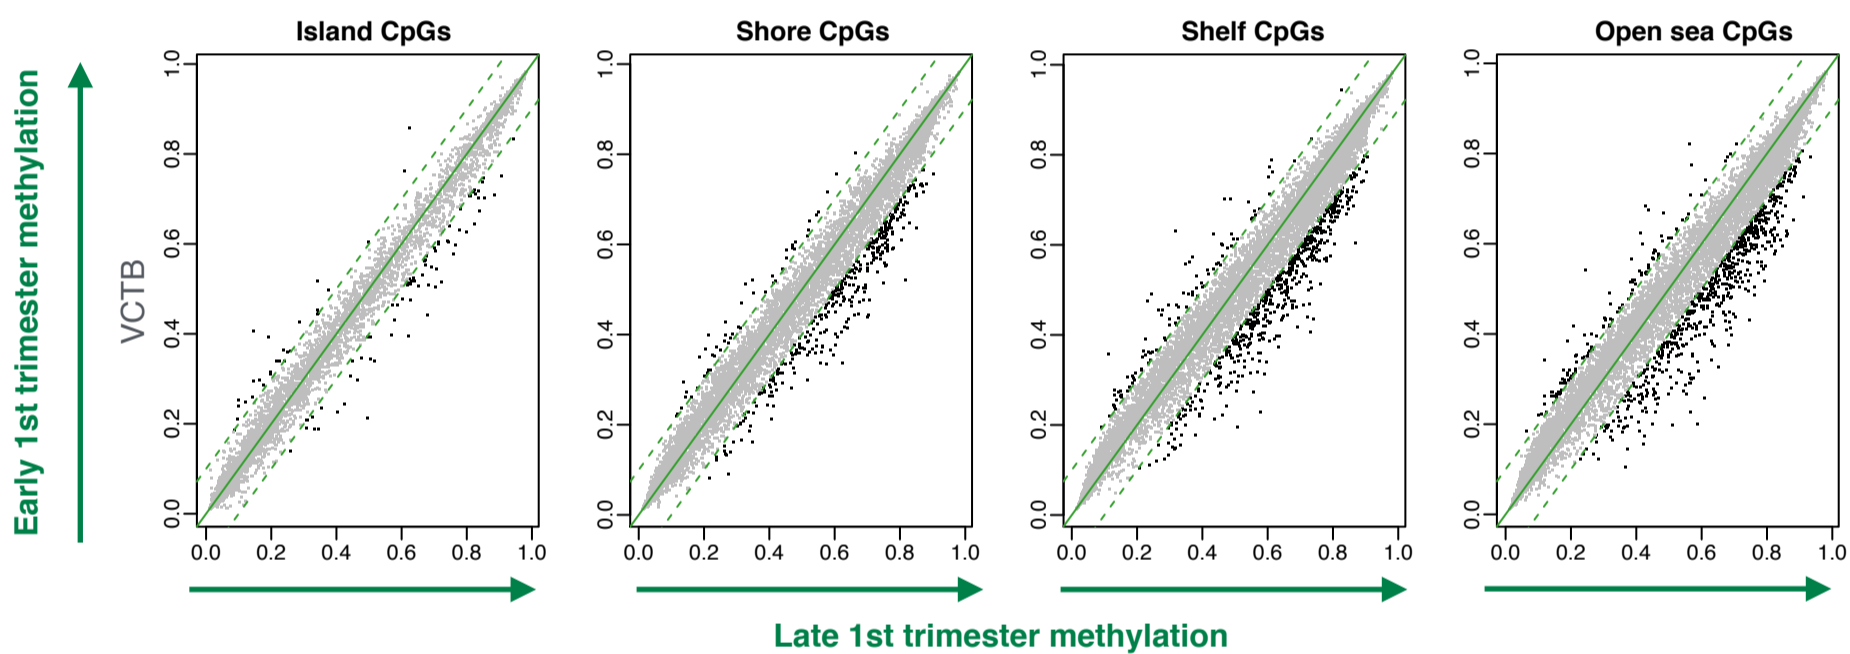

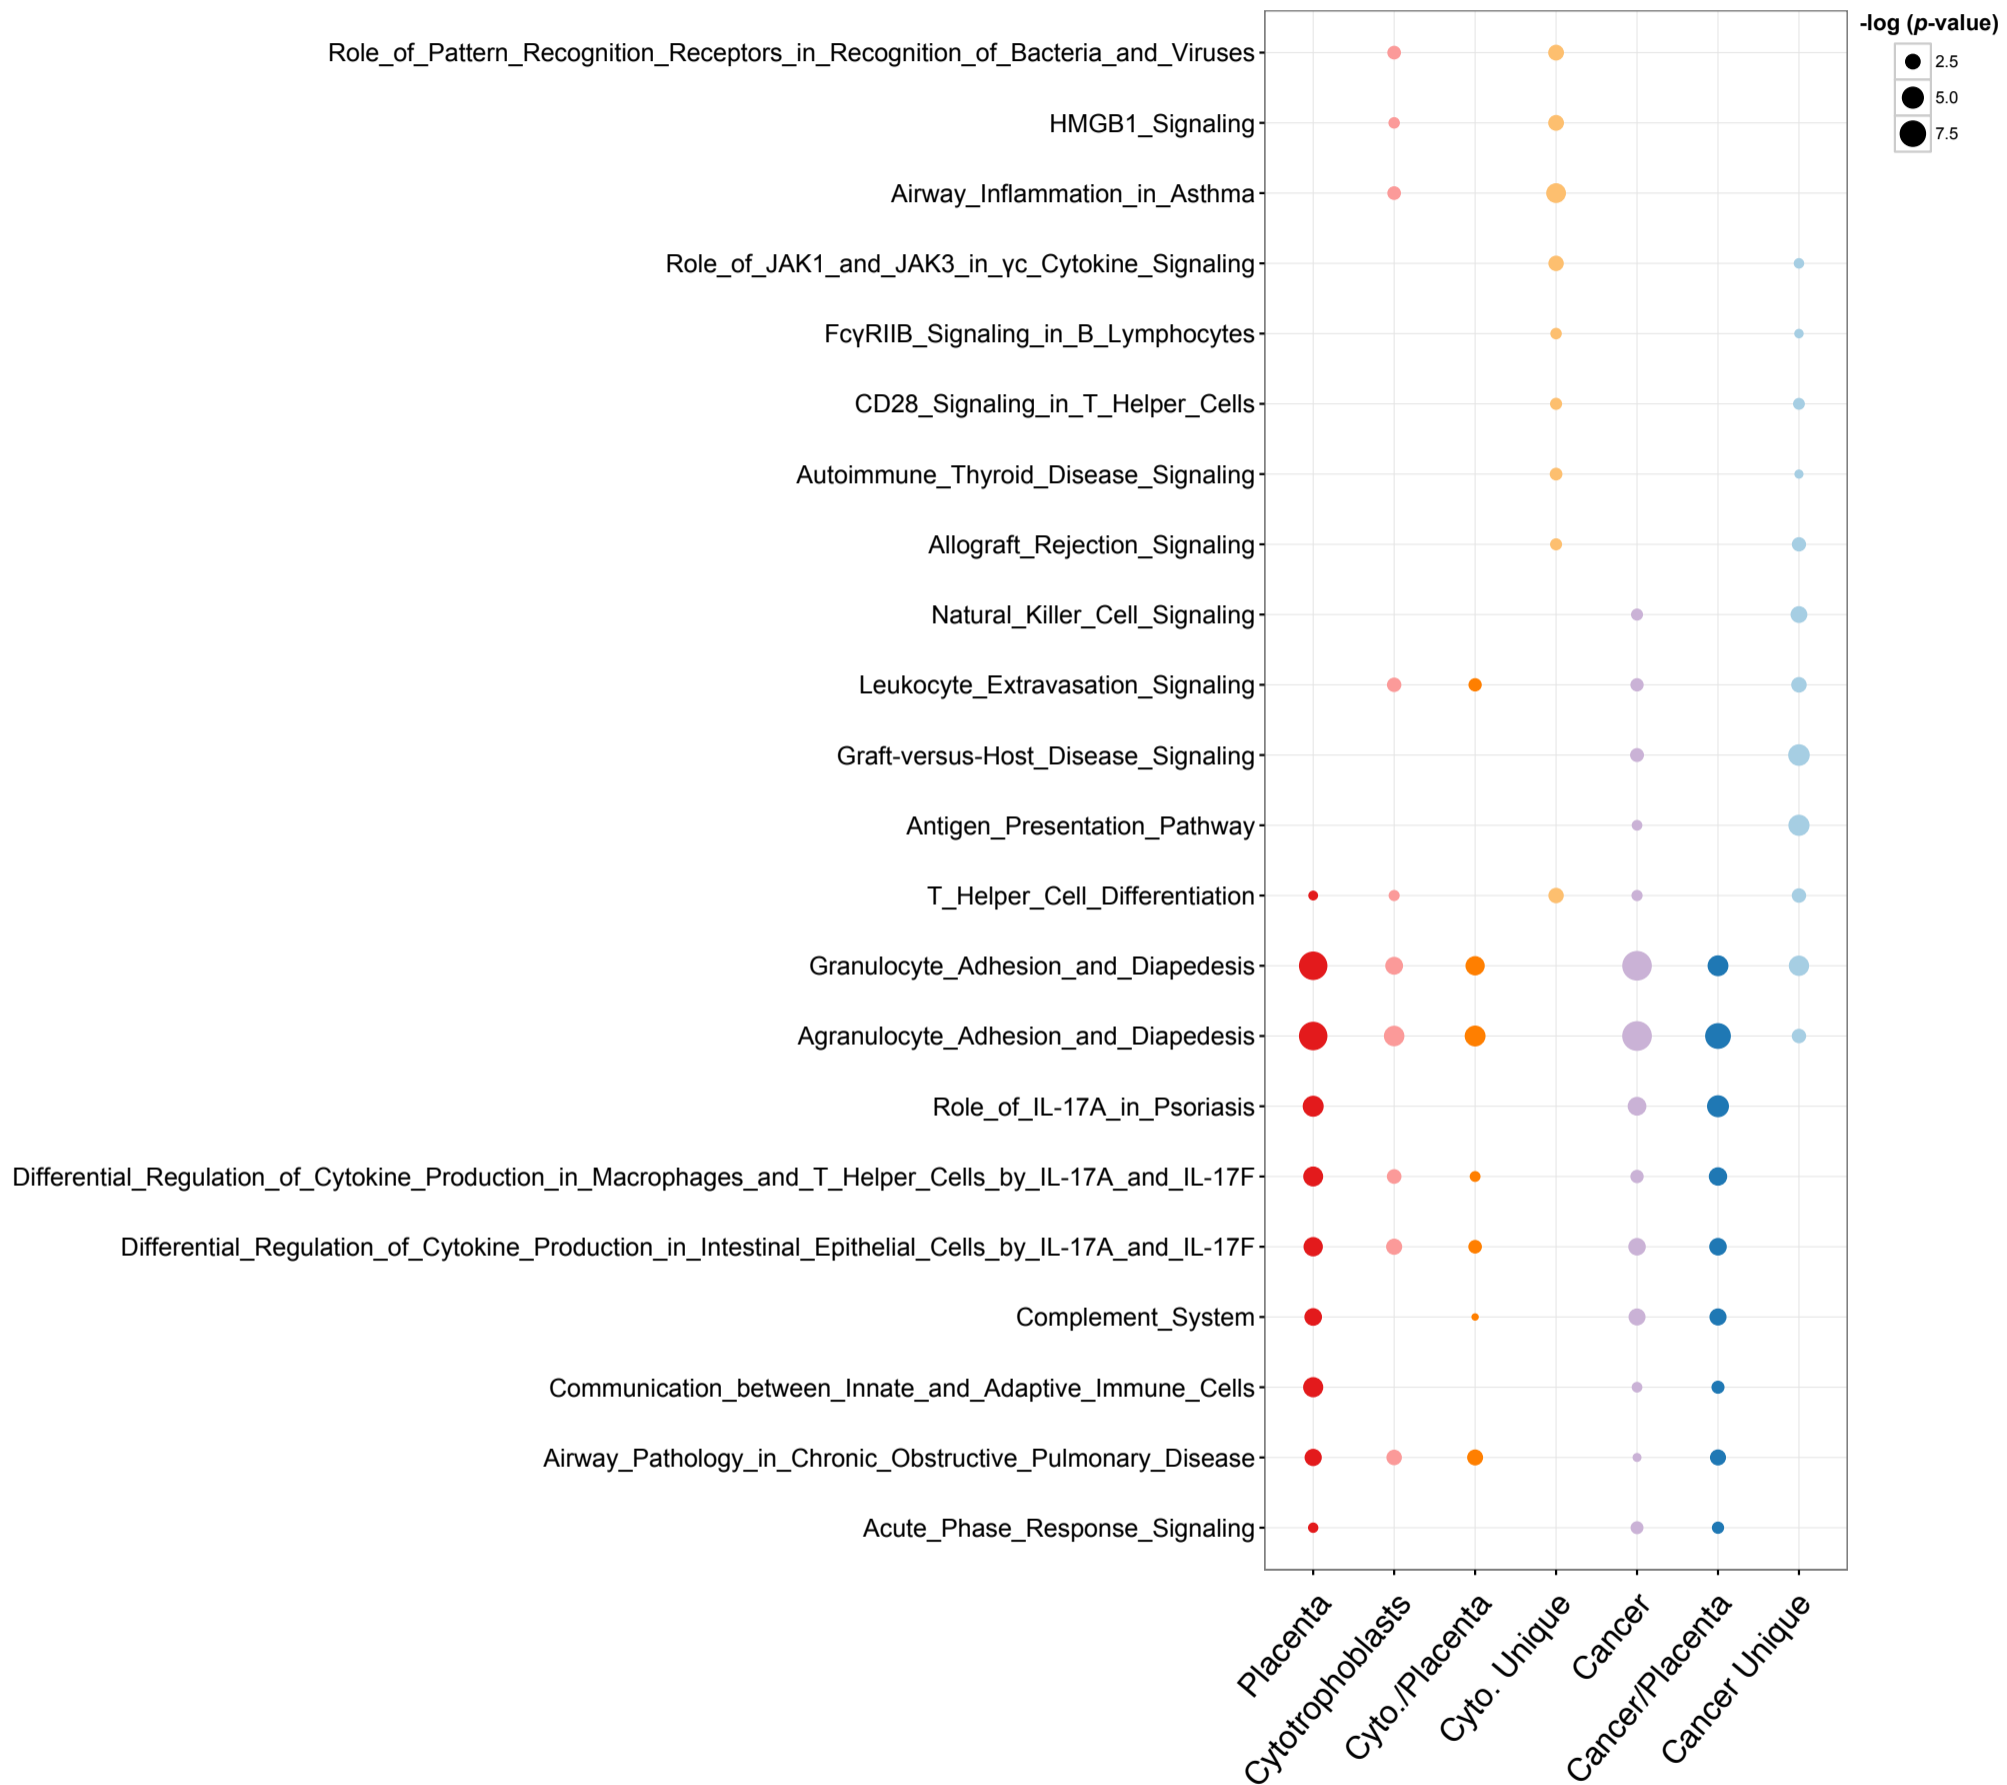

### Supplementary Figure 7

**Bubble chart representing the enrichment of IPA gene sets related to immune response in placenta and cancer hypomethylated blocks (colon adenocarcinoma). “Cancer/Placenta” (“Cancer Unique”) represents genes in cancer hypomethylated blocks that co-localize (do not co-localize) with a placenta hypomethylated block. Only the significant enrichments (p-value < 0.05) are presented. Abbreviations as in Supplementary Table 1.**
